# Supplementary material for: Effect of the Simultaneous Addition of Polycaprolactone and Carbon Nanotubes on the Mechanical, Electrical, and Adhesive Properties of Epoxy Resins Cured with Ionic Liquids
Source: MDPI journal article supplement (doi:10.3390/polym15071607), 2023-03-23
Supplement: s1 [file s1]

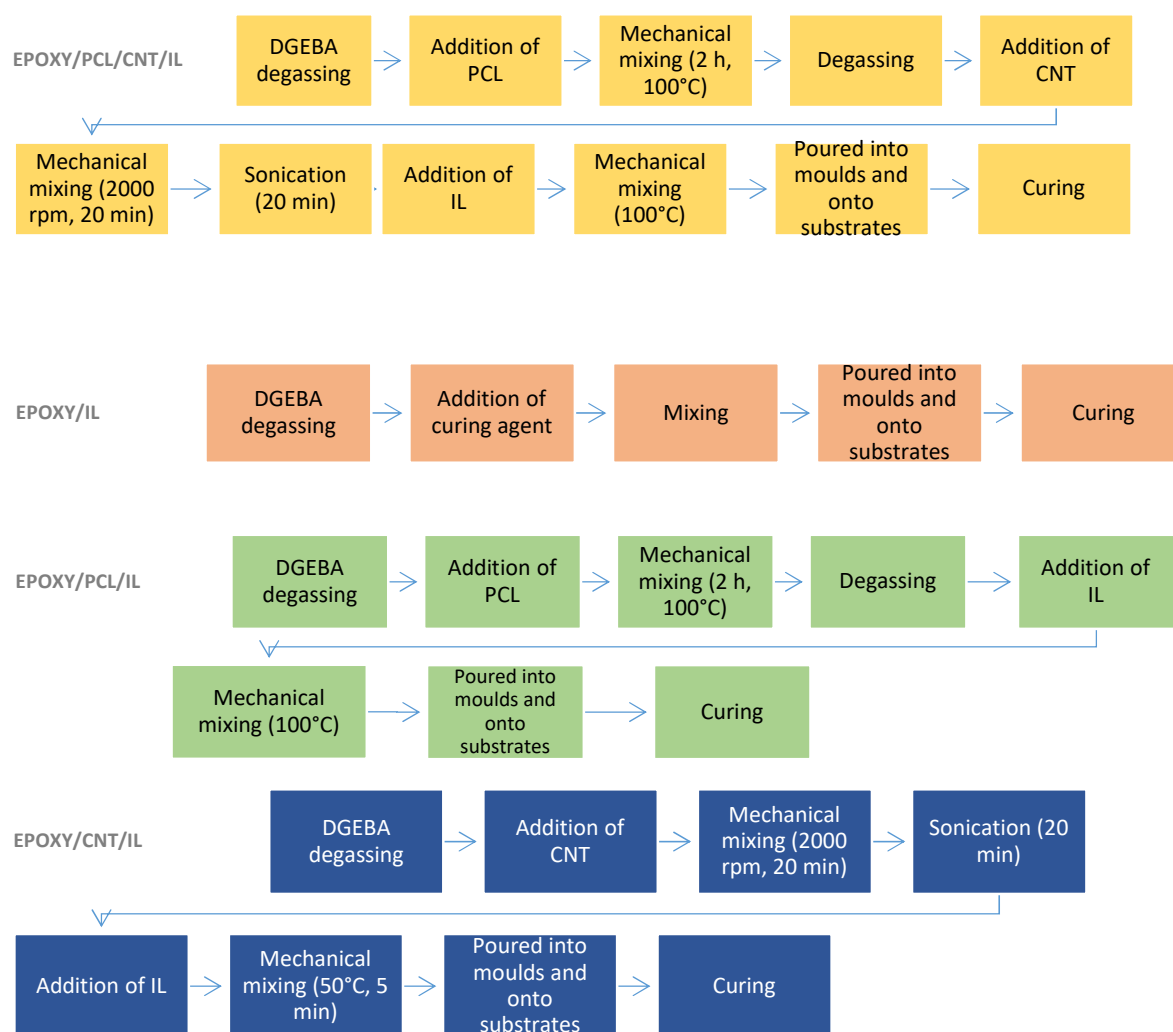

**Figure S1.** Flowchart of the preparation process of the epoxy/PCL/CNT/IL NCs, as well as that of the reference epoxy/IL, epoxy/PCL/IL, and epoxy/CNT/IL systems.
